# Supplementary material for: Mixed behavior of p-phenylenediaminium guest binding with the inverted cucurbit[6]uril host
Source: Royal Society of Chemistry journal article supplement (doi:10.1039/c5ob01074h), 2015-01-01
Supplement: c5ob01074h1.pdf [file c5ob01074h1.pdf]

**Electronic Supplementary Information (ESI)**

**Mixed behavior of *p*-phenylenediaminium guest binding with  
inverted cucurbit[6]uril host**

*De-Qing Zhang<sup>a</sup>, Rui-Lian Lin<sup>b</sup>, Wen-Qi Sun<sup>b</sup>, Zhu Tao<sup>\*,a</sup>, Qian-Jiang Zhu<sup>a</sup> and Jing-Xin Liu<sup>\*,b</sup>*

- 
- a* D.-Q. Zhang, Z. Tao, Q.-J. Zhu  
Key Laboratory of Macrocyclic and Supramolecular Chemistry of Guizhou Province,  
Guizhou University, Guiyang 550025, China  
gzutao@263.net
- b* R.-L. Lin, W.-Q. Sun, J.-X. Liu  
College of Chemistry and Chemical Engineering, Anhui University of Technology,  
Maanshan 243002, China  
jxliu411@ahut.edu.cn

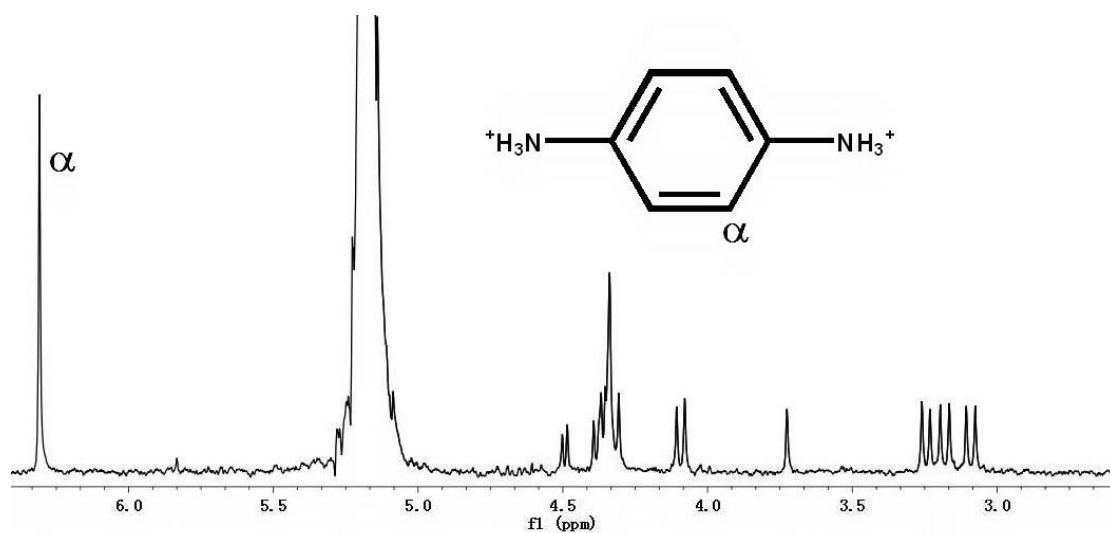

**Figure S1.** <sup>1</sup>H NMR spectra (400 MHz) of *p*-phenylenediaminium in the presence of 0.44 equiv of *i*Q[6] in 4.0 M DCl at 278.15 K.

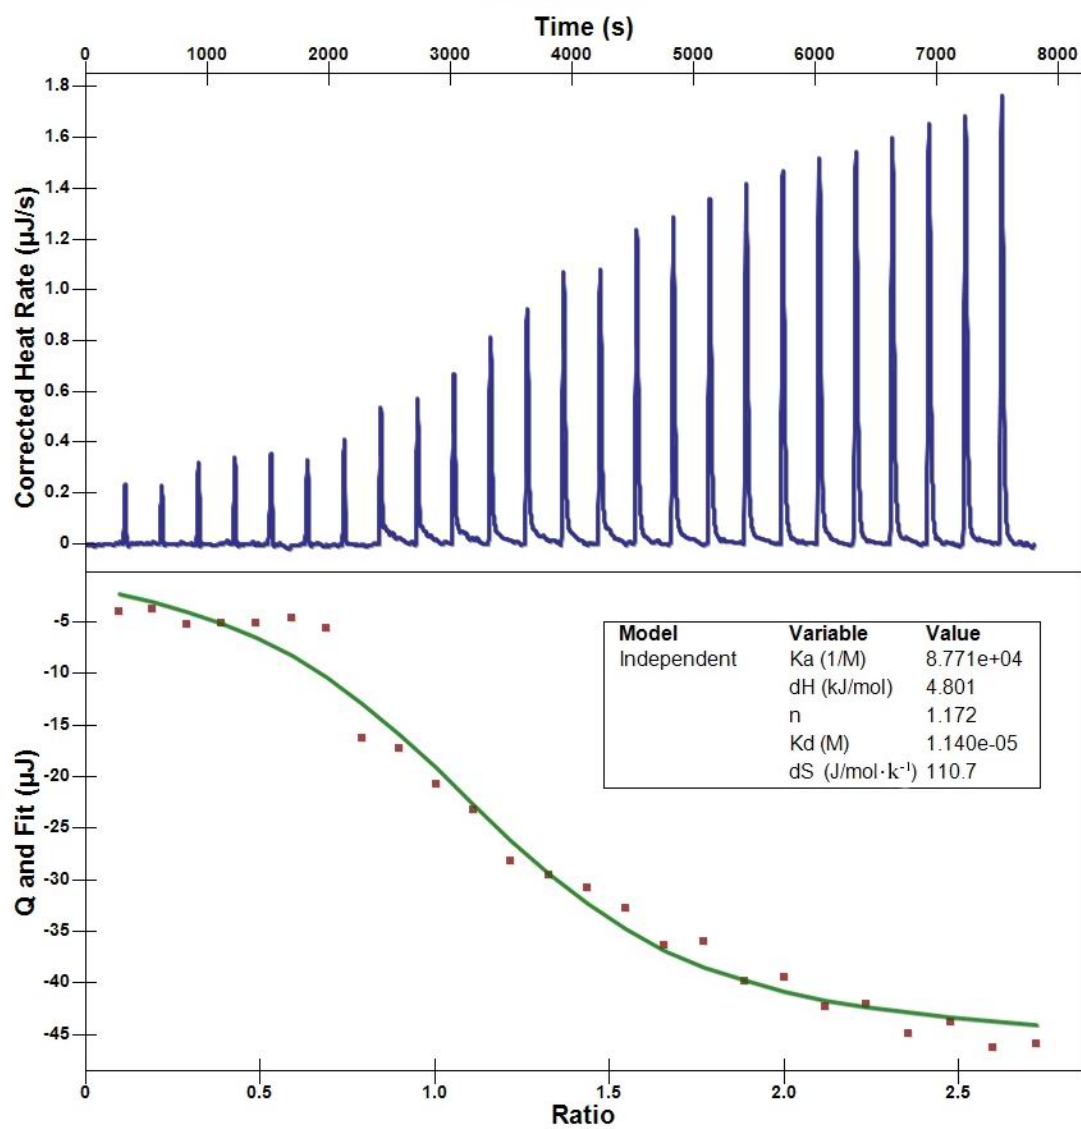

Figure S2 ITC profile of *i*Q[6] with *p*-phenylenediaminium at 298.15 K.
